# Supplementary material
Source: MDPI journal article supplement (https://www.mdpi.com/2297-8739/10/4/268)
Supplement: s1 [file s1]

## Supplementary materials

**Table S1.** Evaluation of repeatability performed on four extra-virgin olive oils of both compounds 3-Hydroxytyrosol and Tyrosol (day 2)

| Compound         | Sample | Average amount <sup>1</sup><br>(in ppm) | RSD <sup>2</sup><br>(in %) |
|------------------|--------|-----------------------------------------|----------------------------|
| 3-Hydroxytyrosol | 1      | 4.674                                   | 1.21                       |
|                  | 2      | 2.987                                   | 0.39                       |
|                  | 3      | 6.067                                   | 0.43                       |
|                  | 4      | 4.242                                   | 0.46                       |
| Tyrosol          | 1      | 4.097                                   | 1.45                       |
|                  | 2      | 4.909                                   | 0.88                       |
|                  | 3      | 5.062                                   | 1.96                       |
|                  | 4      | 5.457                                   | 0.27                       |

<sup>1</sup> Average was determined on four-fold measurements of each hydrolyzed sample.

<sup>2</sup> Calculated relative standard deviation of the four injections put in relation to the detected average amount

**Table S2.** Evaluation of repeatability performed on four extra-virgin olive oils of both compounds 3-Hydroxytyrosol and Tyrosol (day 3)

| Compound         | Sample | Average amount <sup>1</sup><br>(in ppm) | RSD <sup>2</sup><br>(in %) |
|------------------|--------|-----------------------------------------|----------------------------|
| 3-Hydroxytyrosol | 1      | 4.709                                   | 0.38                       |
|                  | 2      | 2.947                                   | 0.73                       |
|                  | 3      | 6.070                                   | 0.78                       |
|                  | 4      | 4.212                                   | 0.36                       |
| Tyrosol          | 1      | 4.132                                   | 1.23                       |
|                  | 2      | 4.825                                   | 0.66                       |
|                  | 3      | 5.090                                   | 1.04                       |
|                  | 4      | 5.487                                   | 0.64                       |

<sup>1</sup> Average was determined on four-fold measurements of each hydrolyzed sample.

<sup>2</sup> Calculated relative standard deviation of the four injections put in relation to the detected average amount.

**Table S3.** Optimization of hydrolysis time

| <b>Time<br/>(in min)</b> | <b>Average<br/>amount<sup>1</sup><br/>(in ppm)</b> | <b>RSD<sup>2</sup><br/>(in %)</b> | <b>Δ from the<br/>highest value<sup>3</sup><br/>(in %)</b> |
|--------------------------|----------------------------------------------------|-----------------------------------|------------------------------------------------------------|
| 10                       | 2.654                                              | 2.73                              | -30.2                                                      |
| 20                       | 3.156                                              | 1.28                              | -16.9                                                      |
| 30                       | 3.488                                              | 2.86                              | -8.20                                                      |
| 40                       | 3.611                                              | 0.64                              | -4.95                                                      |
| 50                       | 3.575                                              | 0.89                              | -5.91                                                      |
| 60                       | 3.755                                              | 1.18                              | -1.17                                                      |
| 70                       | 3.715                                              | 1.66                              | -2.24                                                      |
| 80                       | 3.776                                              | 1.76                              | -0.63                                                      |
| 90                       | 3.727                                              | 1.23                              | -1.93                                                      |
| 100                      | 3.699                                              | 1.28                              | -2.65                                                      |
| 110                      | 3.779                                              | 3.02                              | -0.55                                                      |
| 120                      | 3.800                                              | 1.66                              | -                                                          |
| 150                      | 3.666                                              | 1.56                              | -3.52                                                      |
| 180                      | 3.755                                              | 0.43                              | -1.19                                                      |
| 240                      | 3.618                                              | 1.09                              | -4.79                                                      |
| 300                      | 3.587                                              | 0.91                              | -5.61                                                      |

<sup>1</sup>Sum of tyrosol and hydroxytyrosol levels; average amount calculated over six injections.

<sup>2</sup> Calculated relative standard deviation of the four injections put in relation to the detected average amount.

<sup>3</sup>Difference from the highest value obtained during the hydrolysis time study was calculated.

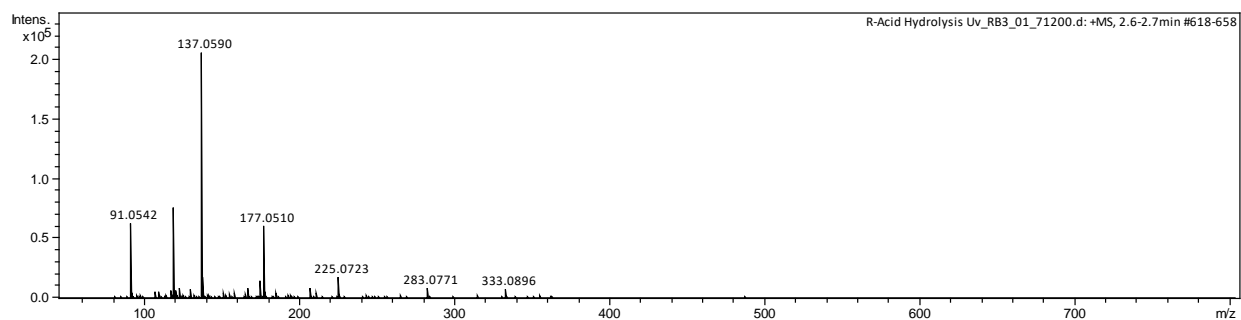

**Figure S1.** Recorded mass spectrum of hydroxytyrosol. 177.051 m/z was identified as  $[M+Na]^+$ , the basepeak at 137.059 corresponds to  $[C_8H_9O_2]^+$ . Electrospray ionization, positive mode, scan from 50-800 m/z, spectra rate 4 Hz.

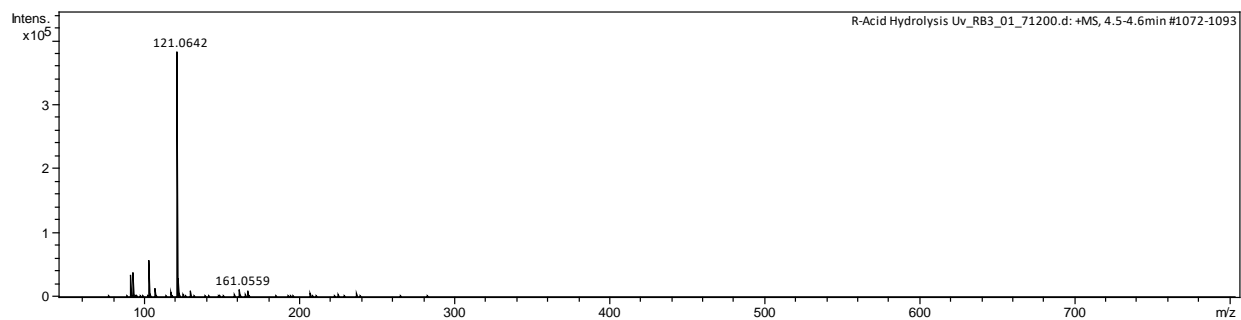

**Figure S2.** Recorded mass spectrum of tyrosol. 161.056 m/z was identified as  $[M+Na]^+$ , the basepeak at 121.064 corresponds to  $[C_8H_9O]^+$ . Electrospray ionization, positive mode, scan from 50-800 m/z, spectra rate 4 Hz.

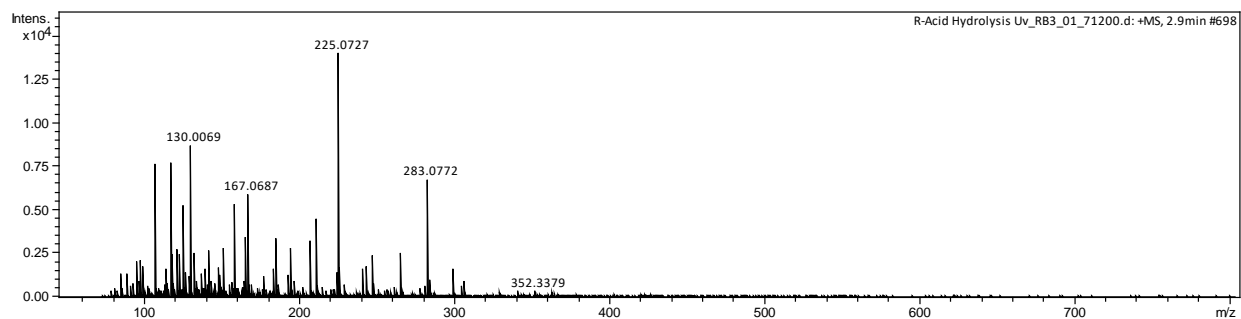

**Figure S3.** Recorded mass spectrum of the unknown signal eluting after hydroxytyrosol. Electrospray ionization, positive mode, scan from 50-800 m/z, spectra rate 4 Hz.

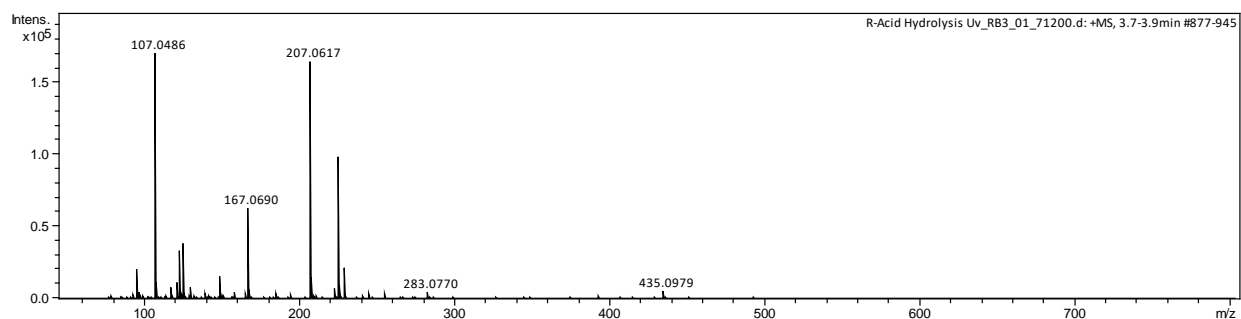

**Figure S4.** Recorded mass spectrum of the broad signal eluting between 3.9 min and 4.4 min. Electrospray ionization, positive mode, scan from 50-800 m/z, spectra rate 4 Hz.
